# Supplementary material for: Gold nanoparticles make chitosan–streptomycin conjugates effective towards Gram-negative bacterial biofilm
Source: Royal Society of Chemistry journal article supplement (doi:10.1039/c5ra22803d), 2016-01-01
Supplement: c5ra22803d1.pdf [file c5ra22803d1.pdf]

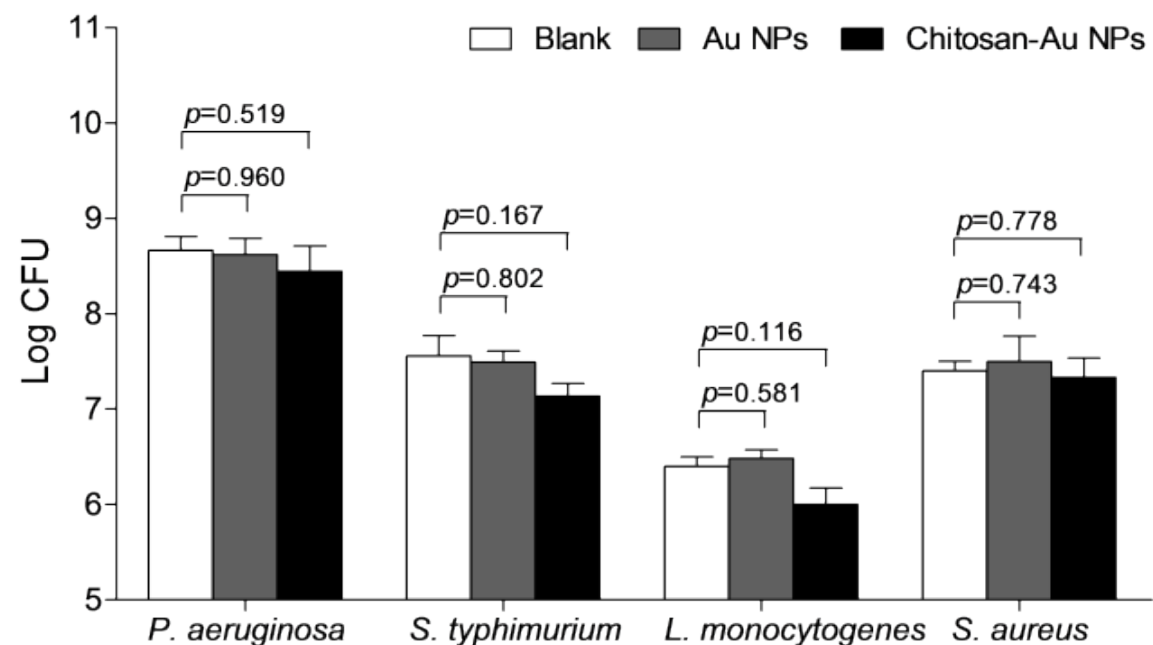

**Fig. S1.** The anti-biofilm capabilities of Au NPs and chitosan-Au NPs. Biofilms formed by *P. aeruginosa* were exposed to Au NPs (250  $\mu\text{g}/\text{mL}$ ) or chitosan-Au NPs (250  $\mu\text{g}/\text{mL}$ ) for 24 h. Biofilms incubated in PBS were used as blank control. Biofilm cells were quantified. These experiments were performed three times with similar results each time. Error bars represent SD.

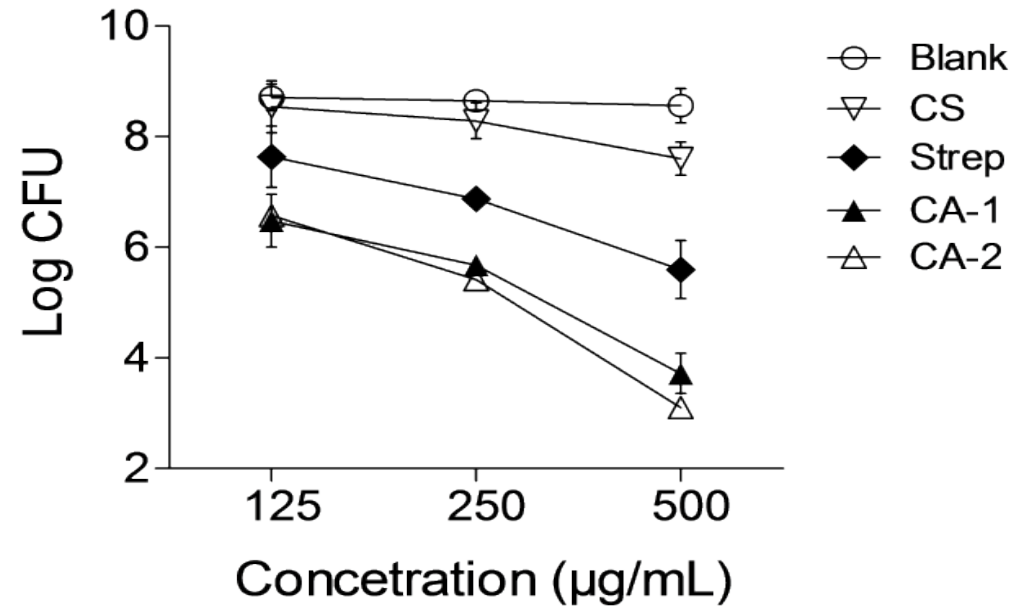

**Fig. S2.** Concentration dependence in the anti-biofilm capabilities of CA NPs. Biofilms formed by *P. aeruginosa* were exposed to CA NPs (125, 250, 500 µg/mL), CS (125, 250, 500 µg/mL) or equivalent streptomycin (25, 50 100 µg/mL) for 24 h. Biofilms incubated in PBS were used as blank control. Biofilm cells were quantified. These experiments were performed three times with similar results each time. Error bars represent SD.

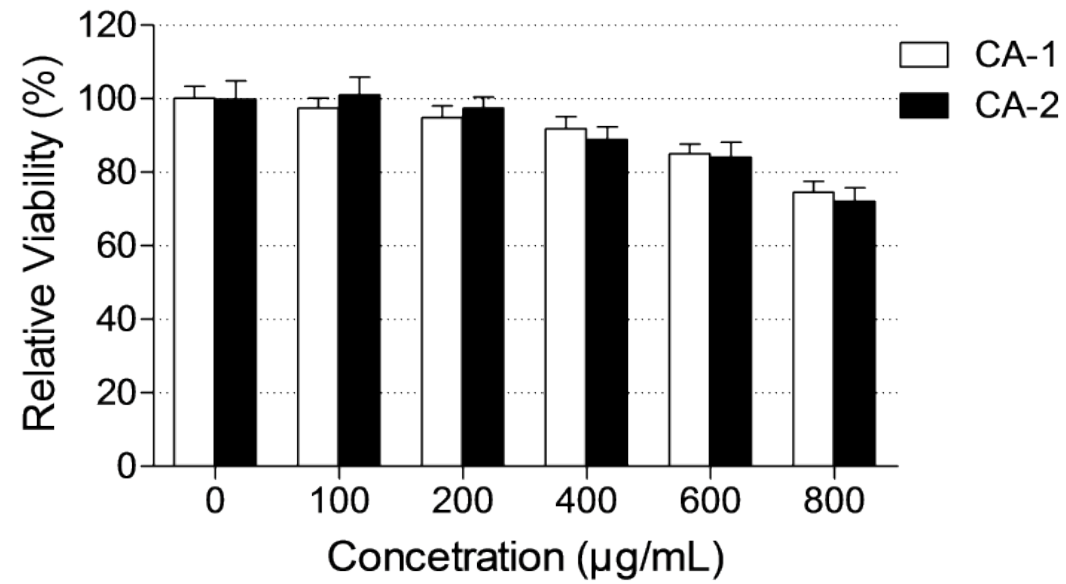

**Fig. S3.** MTT-based assay to determine the cytotoxic effect of CA NPs on RAW264.7 cells.

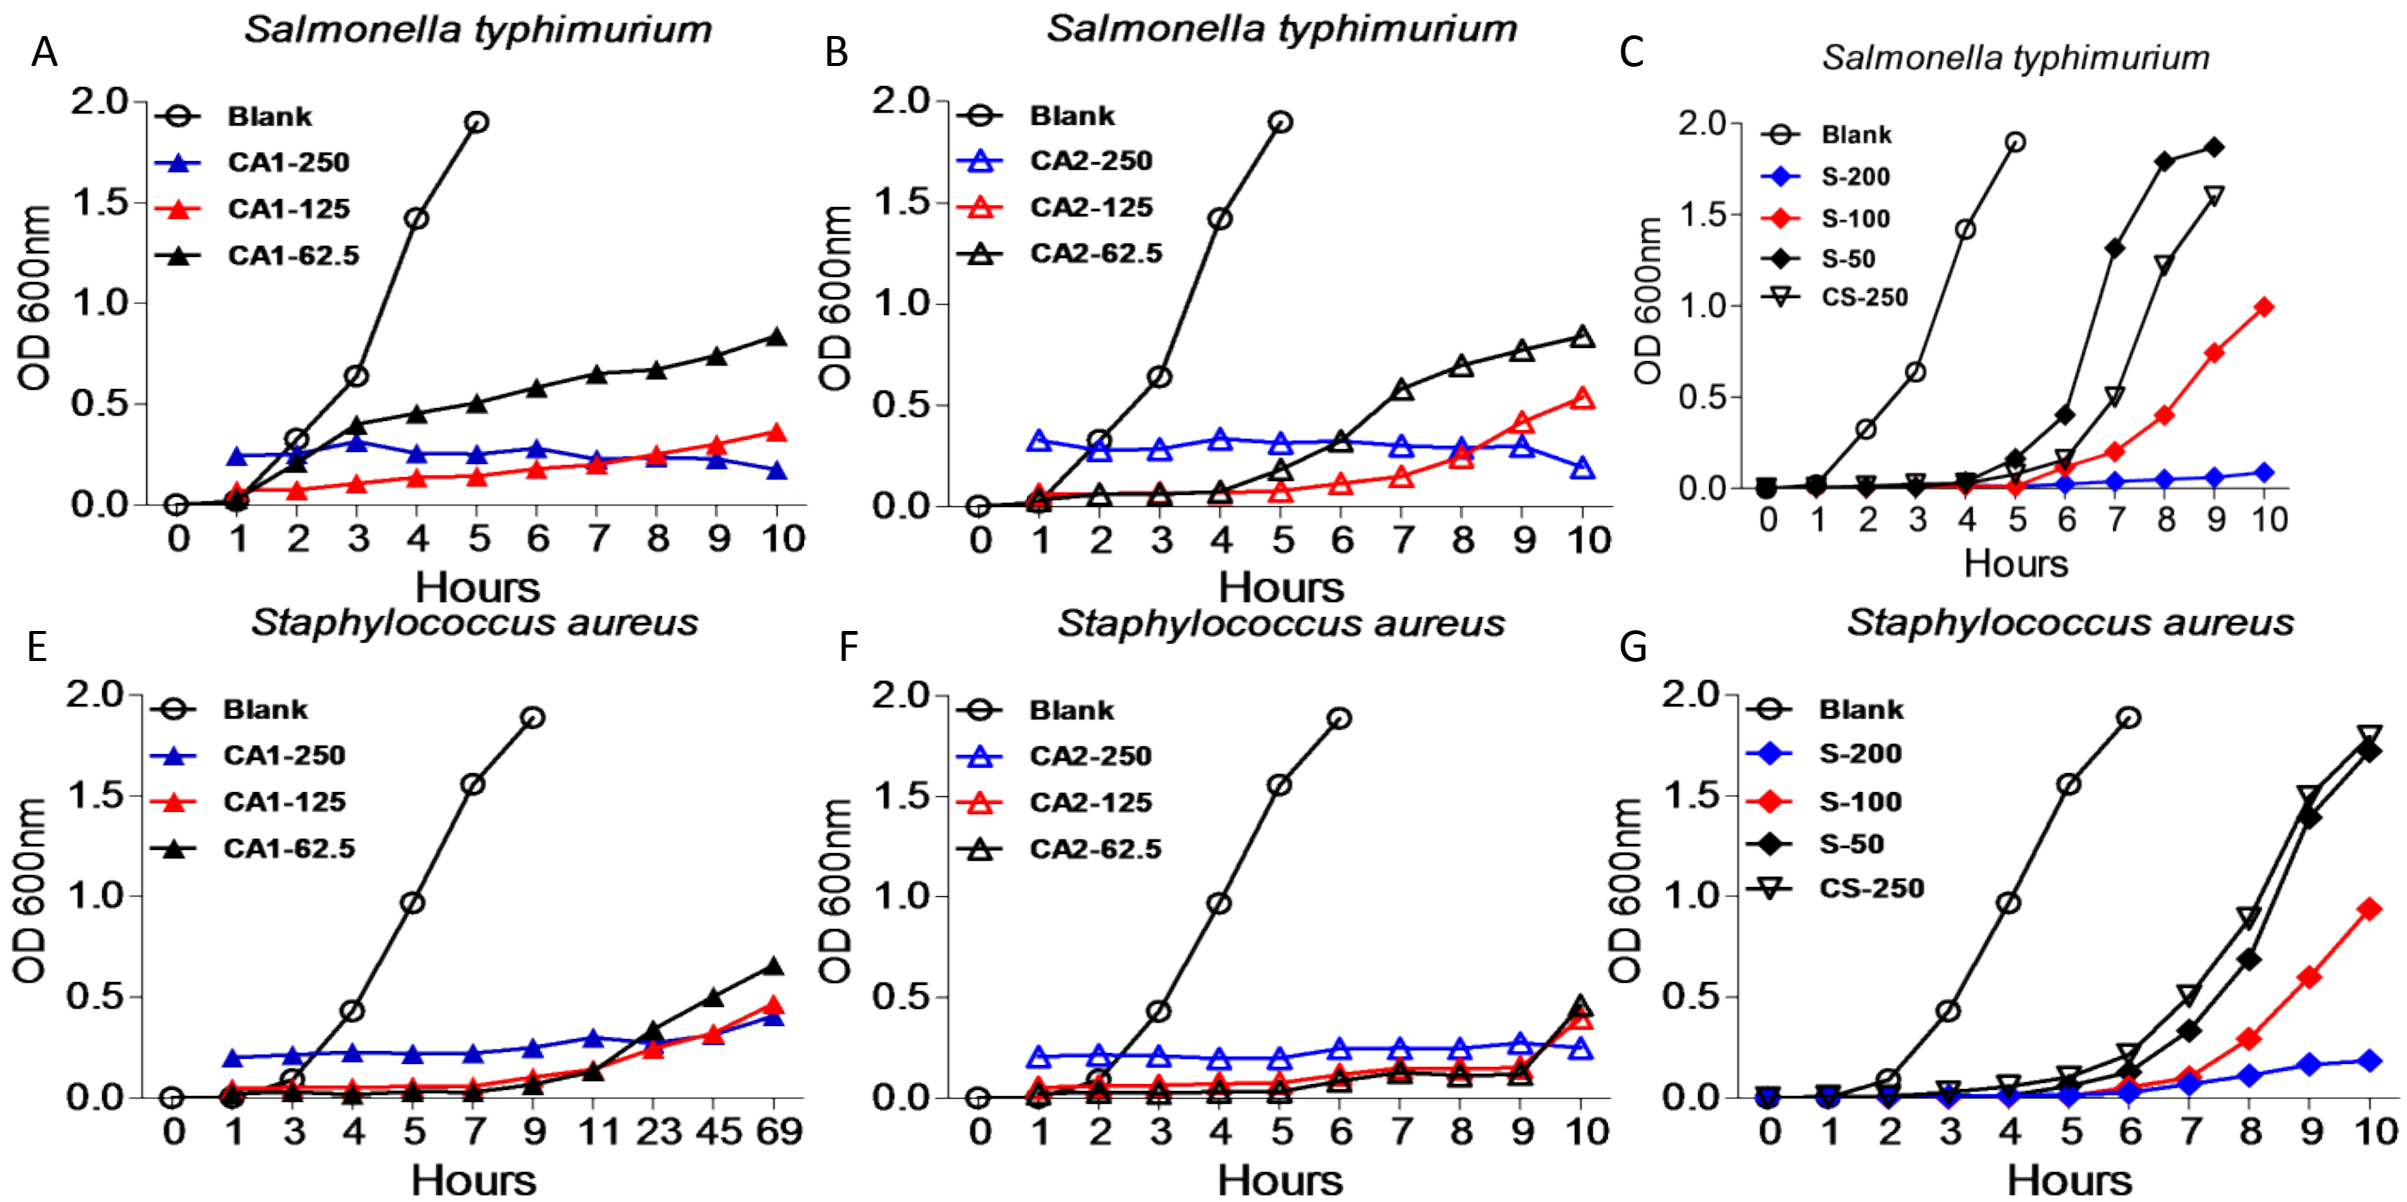

**Fig. S4.** Growth curves of *S. typhimurium* and *S. aureus* obtained by culturing bacteria in TSB containing of compounds with different concentrations as indicated.
